# Supplementary material for: Mapping and Mitigating Misogynist Incel Beliefs: Psychological Foundations and Intervention Strategies
Source: Research Square preprint supplement (doi:10.21203/rs.3.rs-7010338/v1), 2025-11-08
Supplement: Supplementary file 1 [file e495e42e2aba764247ad6824.docx]

**Mapping and Mitigating Misogynist Incel Beliefs: Psychological Foundations and Intervention Strategies**

**Supplement**

**Study 1**

**Methods**

***Measures***

**Misogyny** (*M* = 2.72, *SD* = 1.22; α = .94) was measured with Rottweiler and Gill’s (2021) 10-item Misogyny scale (e.g., “Women use their sexuality to manipulate men”), using a response scale from 1 (*Strongly disagree*) to 7 (*Strongly agree*).

**Violent fantasies about others** (*M* = 1.20, *SD* = 0.45) was measured with a single item used by Scaptura and Boyle (2019) to measure incel beliefs taken from Rosenfeld and colleagues’ (1982) Aggressive Fantasies measure (“Do you sometimes imagine or daydream about using powerful weapons against your enemies?”), using a response scale from 1 (*Never*) to 3 (*Frequently*).

**Violent fantasies about women** (*M* = 1.08, *SD* = 0.28) was measured with a single item used by Scaptura and Boyle (2019) to measure incel beliefs taken from Rosenfeld and colleagues’ (1982) Aggressive Fantasies measure (“Do you sometimes daydream or imagine rape scenes or forcing someone to have sex?”), using a response scale from 1 (*Never*) to 3 (*Frequently*).

**Masculinity threat** (*M* = 2.74, *SD* = 0.53; α = .80) was measured with the 15-item Masculine Gender Role Stress Scale (Eisler & Skidmore, 1987; see also Scaptura & Boyle, 2019; e.g., “[Please indicate how stressful you find each of the following scenarios…]...Admitting that you are afraid of something.”), using a response scale from 1 (*Not at all stressful*) to 5 (*Extremely stressful*).

**Gender status threat** (*M* = 2.27, *SD* = 0.80) was measured with a single item from Willer and colleagues (2013; see also Scaptura & Boyle, 2019; “Recent changes in our society often disadvantage men”), using a response scale from 1 (*Strongly disagree*) to 4 (*Strongly agree*).

**Machismo** (*M* = 1.60, *SD* = 1.08) was measured with a single item taken from Walker’s (2005) Maudsley Violence Questionnaire (MVQ; “Sometimes you have to be violent to show that you are a man”), using a response scale from 1 (*Strongly disagree*) to 7 (*Strongly agree*).

**Gender collective narcissism** (*M* = 2.53, *SD* = 1.10; α = .86) was measured with Golec de Zavala (2013) and colleagues’ five-item collective narcissism scale, adapted for the context of male gender identity (e.g., “Not many people seem to fully understand the importance of men”), using a response scale from 1 (*Strongly disagree*) to 7 (*Strongly agree*).

**Secure gender identification** was measured with Leach and colleagues’ (2008) 10-item ingroup identification scale, adapted for the male gender context. This scale has three sub-dimensions: ingroup satisfaction (*M* = 4.95, *SD* = 1.09; α = .85; e.g., “I am glad to be a man”), ingroup solidarity (*M* = 4.12, *SD* = 1.27; α = .86; e.g., “I feel solidarity with other men”), and ingroup centrality (*M* = 4.33, *SD* = 1.33; α = .77; e.g., “The fact that I am a man is an important part of my identity”). Participants indicated responses from 1 (*Strongly disagree*) to 7 (*Strongly agree*).

**Conspiracy beliefs about feminism** (*M* = 3.01, *SD* = 1.36; α = .93) were measured with Marchlewska and colleagues’ (2019) eight-item scale (e.g., “Feminist ideology was created in order to destroy traditional relationships”), using a response scale from 1 (*Strongly disagree*) to 7 (*Strongly agree*).

**Dark triad personality traits** were measured with Jonason and Webster’s (2010) 12-item Dirty Dozen scale using a response scale from 1 (*Strongly disagree*) to 7 (*Strongly agree*). This scale was separated into its three sub-dimensions: Machiavellianism (*M* = 2.62, *SD* = 1.19; α = .80), psychopathy (*M* = 2.77, *SD* = 1.14; α = .75), and narcissism (*M* = 2.79, *SD* = 1.23; α = .84).

**Self-esteem** (*M* = 5.01, *SD* = 2.12) was measured with Robins and colleagues’ (2001) Single-Item Self-Esteem Scale (SISES; “I have high self-esteem”), using a response scale from 1 (*Not at all true for me*) to 9 (*Very true for me*).

**Mental health** (*M* = 3.21, *SD* = 1.25) was measured with Ahmad and colleagues’ (2014) Single-Item Measure of Self-Related Mental Health (SRMH; “In general, would you say your mental health is: Excellent, Very Good, Good, Fair or Poor?”), using a response scale from 1 (*Poor*) to 5 (*Excellent*).

**Gender system justification** (*M* = 5.03, *SD* = 1.34; α = .82) was measured with Jost and Kay’s (2005) eight-item Gender System Justification (GSJ) scale (e.g., “Most policies relating to gender and the sexual division of labor serve the greater good”), using a response scale from 1 (*Strongly disagree*) to 9 (*Strongly agree*).

**Social dominance orientation** (*M* = 3.01, *SD* = 1.77; α = .81) was measured with Aichholzer and Lechner’s (2021) four-item Short Social Dominance Orientation (SSDO) scale (e.g., “Superior groups should dominate inferior groups”), using a response scale from 1 (*Strongly disfavour*) to 10 (*Strongly favour*).

**Right-wing authoritarianism** (*M* = 4.04, *SD* = 1.55; α = .78) was measured with Bizumic and Duckitt’s (2018) six-item Very Short Authoritarianism (VSA) scale (e.g., “What our country needs most is discipline, with everyone following our leaders in unity”), using a response scale from 1 (Very *strongly disagree*) to 9 (*Very strongly agree*).

**Revenge planning** (*M* = 2.94, *SD* = 1.24; α = .94) was measured with Denson and colleagues’ (2006) 11-item revenge planning sub-scale from the displaced aggression questionnaire (e.g., “If somebody harms me, I am not at peace until I can retaliate”), using a response scale from 1 (S*trongly disagree*) to 9 (*Strongly agree*).

**Perceived symbolic threat of women** (*M* = 1.93, *SD* = 1.60) was measured with Imhoff and Bruder’s (2014) single item measure (“How threatening are women to your values, convictions, norms, and general lifestyle?”), using a response scale from 1 (*Not at all threatening*) to 11 (*Very threatening*).

**Perceived realistic threat of women** (*M* = 1.90, *SD* = 1.68) was measured with Imhoff and Bruder’s (2014) single item measure (“How threatening are women to your material and physical well-being?”), using a response scale from 1 (*Not at all threatening*) to 11 (*Very threatening*).

**Competitive victimhood** (*M* = 2.91, *SD* = 1.47) was measured with Sullivan and colleagues’ (2012) single item measure (“In society, compared with women, men experience ____ discrimination”), using a response scale from 1 (*less overall*) to 7 (*more overall*).

**Subjective socio-economic status** (*M* = 3.70, *SD* = 1.49) was measured by asking participants “How would you rate your own social economic status? Please use the scale below, from 1 (working class) to 8 (upper class)” using a response scale from 1 (*Working class*) to 8 (*Upper class*).

**Educational attainment** (*M* = 3.56, *SD* = 1.16) was measured by presenting participants with the statement “Highest level of completed education:” and a response scale from 1 (*No formal education*) to 7 (*PhD/higher*).

**Religiosity** (*M* = 2.02, *SD* = 1.58) was measured by asking participants “How religious would you describe yourself?”, using a response scale from 1 (*Not at all religious*) to 7 (*Very religious*).

**Relationship status** was measured by asking participants “How would you describe your relationship status?” with the response options: *In a relationship* (*N* = 265), *Single* (*N* = 118), *Other (specify if you wish)* (*N* = 7), and *Prefer not to say* (*N* = 2). This measure was recoded so that 1 = *In a relationship,* 0 = *Single,* and all other responses were recorded as missing values.

**Political orientation** (*M* = 4.36, *SD* = 1.83; α = .92) was measured with three items, asking participants about their self-placed general (“Where on the following scale of political orientation (from extremely liberal to extremely conservative) would you place yourself (overall, in general)?”), social (“In terms of social and cultural issues in particular, how liberal or conservative are you?”), and economic ideology (“In terms of economic issues in particular, how liberal or conservative are you?”), using a response scale from 1 (*extremely liberal*) to 9 (*extremely conservative*). These items were combined into an overall measure of political orientation.

**Results**

***Exploratory factor analysis***

**Table S1**

*Exploratory Factor Analysis of Main Variables in Study 1.*

|  | ML1 | ML2 | ML3 | ML4 | ML5 |
| --- | --- | --- | --- | --- | --- |
| Fem. CTs | .84 |  |  |  |  |
| Conservatism | .67 |  |  |  |  |
| Status threat | .64 |  |  |  |  |
| Misogyny | .59 |  |  |  |  |
| System just. | .59 |  |  |  |  |
| Victimhood | .56 |  |  |  |  |
| SDO | .54 |  |  |  |  |
| Coll. Narc. | .52 |  |  |  |  |
| RWA | .51 |  |  |  |  |
| Mental health |  | .88 |  |  |  |
| Self-esteem |  | .62 |  |  |  |
| Age |  | .33 |  |  |  |
| Machiavellian |  |  | .81 |  |  |
| Psychopathy |  |  | .71 |  |  |
| Narcissism |  |  | .60 |  |  |
| Revenge |  |  | .46 |  |  |
| Ingroup solidarity |  |  |  | .81 |  |
| Ingroup centrality |  |  |  | .73 |  |
| Ingroup satisfaction |  |  |  | .71 |  |
| Symbolic threat |  |  |  |  | .72 |
| Realistic threat |  |  |  |  | .88 |

*Note.* All values are standardised factor loadings. Fem. CTs = Conspiracy beliefs about feminism; System just. = System justification; SDO = Social dominance orientation; Coll. Narc. = Collective narcissism; RWA = Right-wing authoritarianism.

**Study 2**

***Measures***

Response scales were scored from 1 (*Strongly disagree*) to 9 (*Strongly agree*) unless otherwise mentioned.

**Misogynist incel beliefs variables**

***Manosphere ideology*** (*M* = 4.39, *SD* = 2.14; *a* = .89) was measured with four original items (e.g., “Modern society discriminates against men and favors women in many areas”).

***Hostility towards women*** (*M* = 4.48, *SD* = 2.08; *a* = .84) was measured with three original items (e.g., “I believe many men are falsely accused of harassment or assault due to feminist influence”).

***Belief in male domination*** (*M* = 4.34, *SD* = 2.25; *a* = .89) was measured with three original items (e.g., “Men should assert their authority in relationships to maintain a healthy dynamic”).

***Psychological distress with gender dynamics*** (*M* = 4.57, *SD* = 2.56) was measured with the single original item “It’s hard for men to get a fair chance in relationships these days due to unrealistic expectations from women”.

***Consumption of manosphere content*** (*M* = 4.79, *SD* = 2.21) was measured with the single original item “I prefer consuming media that challenges the mainstream view of gender equality”.

***Perceptions of discrimination against men*** (*M* = 4.81, *SD* = 2.48) was measured with the single original item “There is a lot of discrimination against men in today's society”.

**Conspiracy beliefs and misinformation variables**

***Conspiracist worldview*** (*M* = 4.41, *SD* = 1.94; *a* = .94) was measured with the 11-item Conspiracist Worldview Scale (CWS; Biddlestone et al., 2025). This was also split into two sub-scales, one six-item conspiracy suspicions sub-scale (e.g., “The power held by heads of state is second to that of secret groups who really control world politics”; *M* = 4.89, *SD* = 2.20; *a* = .95), and a five-item free-thinking truth-seeker sub-scale (e.g., “I frequently engage with fellow truth seekers who are driven to uncover hidden knowledge”; *M* = 3.83, *SD* = 2.11; *a* = .93).

***Belief in election conspiracy theories*** (*M* = 4.52, *SD* = 2.30; *a* = .78) was measured with two original items (e.g., “I think the 2024 US elections will be rigged).

***Belief in climate change conspiracy theories*** (*M* = 4.13, *SD* = 2.43; *a* = .90) was measured with three items from van der Linden and colleagues (2020; e.g., “Climate scientists and their political allies are deliberately misleading the public about global warming”).

***Belief in anti-vaccine misinformation*** (*M* = 3.49, *SD* = 2.40) was measured with the original single item “Vaccines cause autism in children”.

***Belief in conspiracy theories about Comprehensive Sexuality Education (CSE)*** was measured with seven original items (e.g., “CSE is part of a coordinated attempt by global elites to corrupt children and destroy traditional values”; *M* = 3.81, *SD* = 2.29; *a* = .95).

***Truth discernment*** (*M* = 10.71; *SD* = 3.30; *a* = .73) was measured using Maertens and colleagues’ (2024) 16-item Misinformation Susceptibility Test (MIST-16), which includes eight real news headlines (e.g., “United Nations Gets Mostly Positive Marks from People Around the World”) and eight fake news headlines (e.g., “Government Officials Have Manipulated Stock Prices to Hide Scandals”). Participants rate whether they believe each headline is *True* or *False.* Truth discernment was scored by the sum of correct detection of both the real and fake news headlines, with 16 as the highest possible score.

***Anti-science beliefs*** (*M* = 4.26, *SD* = 2.07; *a* = .82) were measured with three items from Azevedo and Jost (2021; e.g., “In general, faith is an equally good (or better) source of wisdom & knowledge as is science”).

***Distrust of experts*** (*M* = 3.91, *SD* = 1.70; *a* = .69) was measured with three items from Azevedo and colleagues (2019; e.g., “I’d rather put my trust in the wisdom of ordinary people than the opinions of experts and intellectuals”).

**Political attitudes variables**

***Social operational ideology*** (*M* = 4.06, *SD* = 1.62; *a* = .73) was measured with Zell and Bernstein’s (2013) seven-item sub-scale (e.g., “Abortion should be illegal in all or most cases”). Higher scores indicated stronger social conservatism, and lower scores indicated stronger social liberalism.

***Economic operational ideology*** (*M* = 4.33, *SD* = 1.48; *a* = .65) was measured with Zell and Bernstein’s (2013) five-item sub-scale (e.g., “Government regulation of business usually does more harm than good”). Higher scores indicated stronger economic conservatism, and lower scores indicated stronger economic liberalism.

***Reactionary political beliefs*** (*M* = 5.85, *SD* = 2.21; *a* = .82) were measured with three items from Rothmund and colleagues (2022; e.g., “The true American way of life is disappearing so fast that we must do anything, and everything, to save it”).

***Rejection of diversity, equity, and inclusion (DEI) policies*** (*M* = 4.83, *SD* = 2.01; *a* = .90) was measured with five items from Azevedo (2023; e.g., “Diversity, Equity, and Inclusion (DEI) policies are against free speech and free expression”).

***PragerU ideology*** (*M* = 4.18, *SD* = 1.75; *a* = .82) was measured with six original items taken from statements made by PragerU (e.g., “The moment you affirm equality, you will lose liberty”).

**Ideological rationalisation variables**

***Gender system justification*** (*M* = 5.09, *SD* = 1.76; *a* = .84) was measured with five items from Azevedo and colleagues (2019; e.g., “In general, relations between men and women are fair”).

***Dangerous worldview*** (*M* = 5.25, *SD* = 1.83; *a* = .45) was measured with two items from Womick and colleagues (2019; e.g., “Every day, our society become more lawless and bestial, a person’s chances of being robbed, assaulted, and even murdered go up and up”).

***Competitive worldview*** (*M* = 4.50, *SD* = 1.94; *a* = .55) was measured with two items from Womick and colleagues (2019; e.g., “It’s a dog-eat-dog world where you have to be ruthless at times”).

***Dominance orientation*** (*M* = 3.56, *SD* = 1.51; *a* = .82) was measured with eight items from the Ho and colleagues (2015) social dominance orientation (SDO) sub-scale of dominance (e.g., “Some groups of people must be kept in their place”).

***Anti-egalitarianism*** (*M* = 3.53, *SD* = 1.65; *a* = .88) was measured with eight items from the Ho and colleagues (2015) SDO sub-scale of anti-egalitarianism (e.g., “We should not push for group equality”).

***Authoritarian aggression*** (*M* = 5.59, *SD* = 1.58; *a* = .52) was measured with four items from the Cohrs and colleagues (2005) Right-Wing Authoritarianism (RWA) aggression sub-scale (e.g., “What our country needs instead of more “civil rights” is a good stiff dose of law and order”).

***Authoritarian submission*** (*M* = 4.55, *SD* = 1.49; *a* = .61) was measured with four items from the Cohrs and colleagues (2005) RWA submission sub-scale (e.g., “Obedience and respect for authority are the most important values children should learn”).

***Authoritarian conventionalism*** (*M* = 4.97, *SD* = 1.84; *a* = .72) was measured with four items from the Cohrs and colleagues (2005) RWA conventionalism sub-scale (e.g., “The withdrawal from tradition will turn out to be a fatal fault one day”).

**Prejudice variables**

***Homophobia*** (*M* = 4.69, *SD* = 2.33; *a* = .93) was measured with five items from Cichocka and colleagues (2022; e.g., “Lesbian women and Gay men are abnormal”).

***Hostile sexism*** (*M* = 4.42, *SD* = 1.75; *a* = .87) was measured with seven items from Cichocka and colleagues (2022; e.g., “Discrimination against women is no longer a problem in the United States”).

***Transgender prejudice*** (*M* = 4.82, *SD* = 2.38; *a* = .89) was measured with four items from Cichocka and colleagues (2022; e.g., “Transgender individuals should not be allowed to change their gender legally”).

**Study 4**

**Methods**

***Study stimuli***

**Control group infographic**


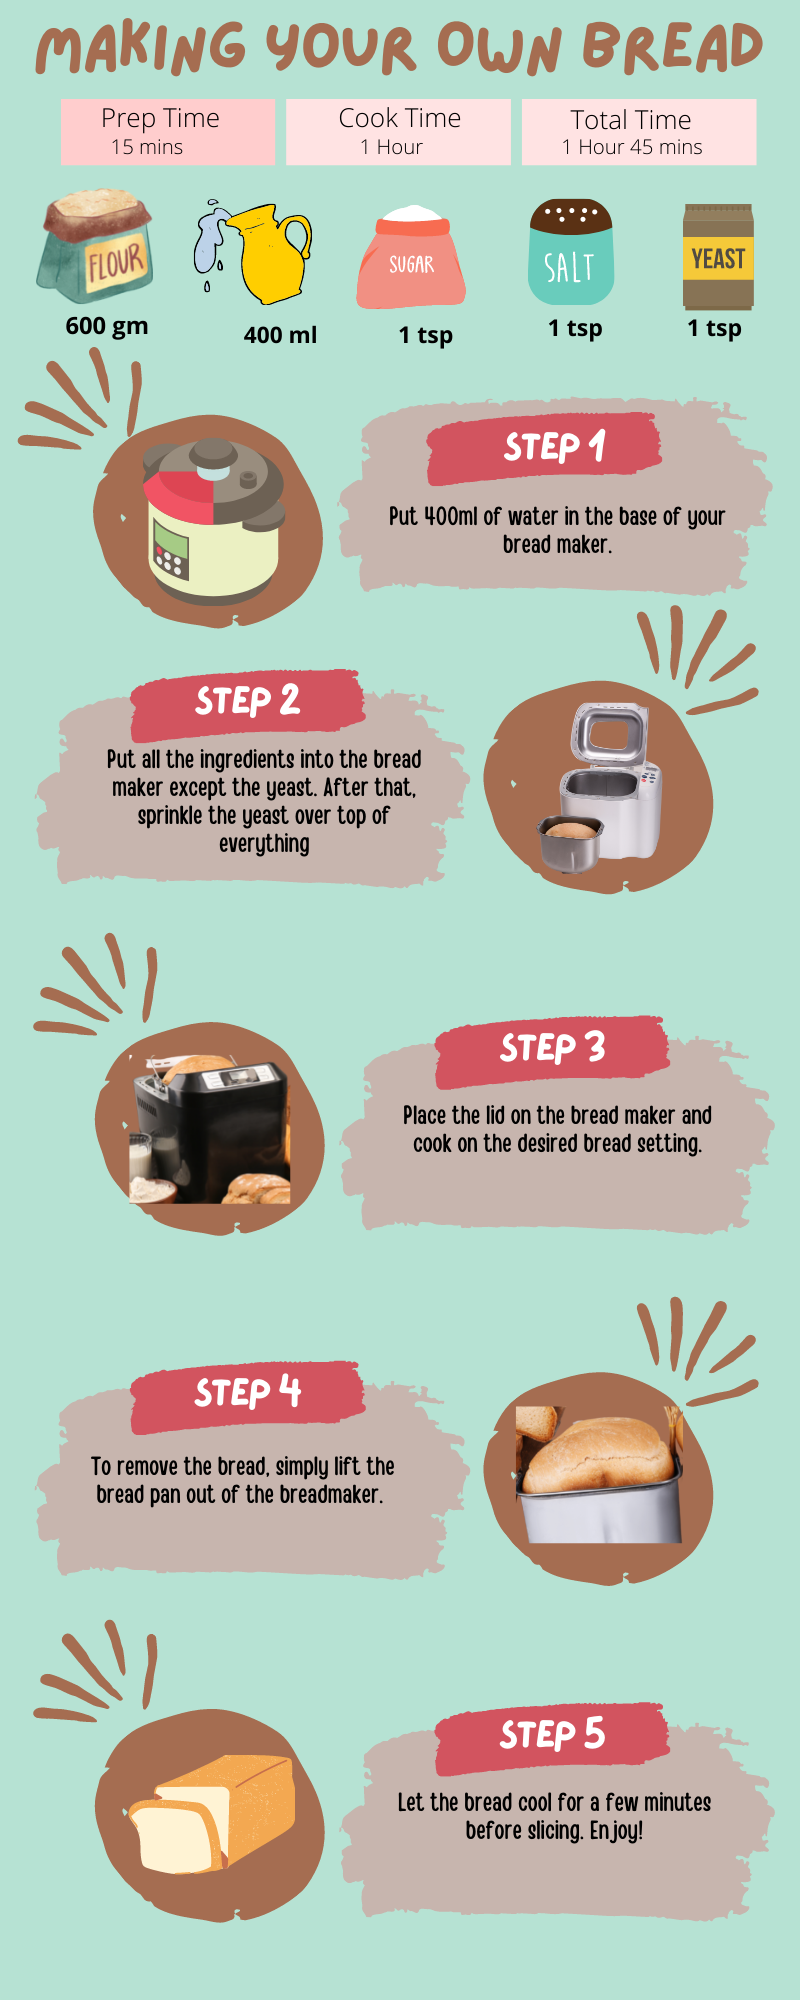


**Item rating task**

***Manipulative items***


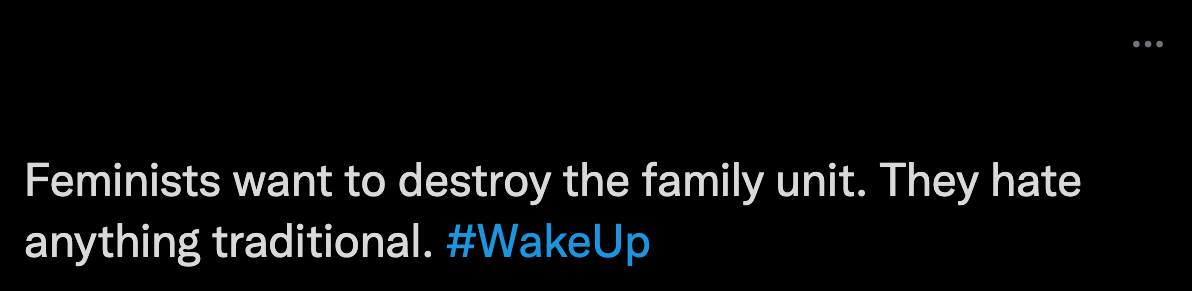


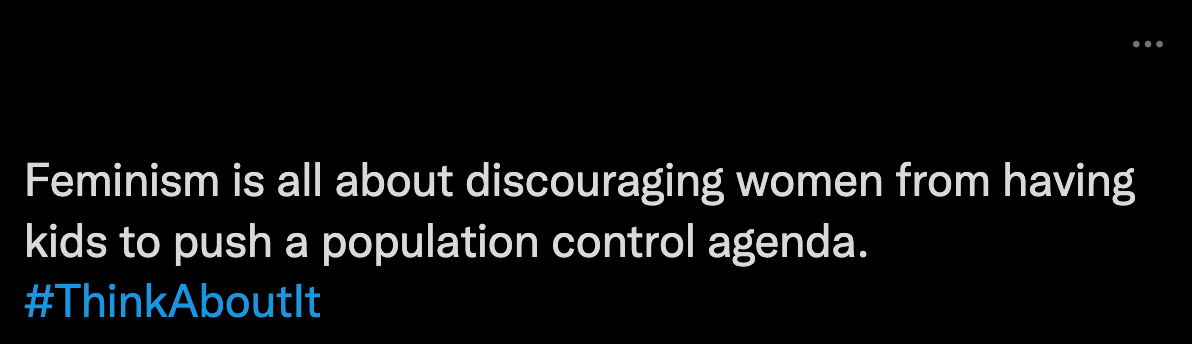


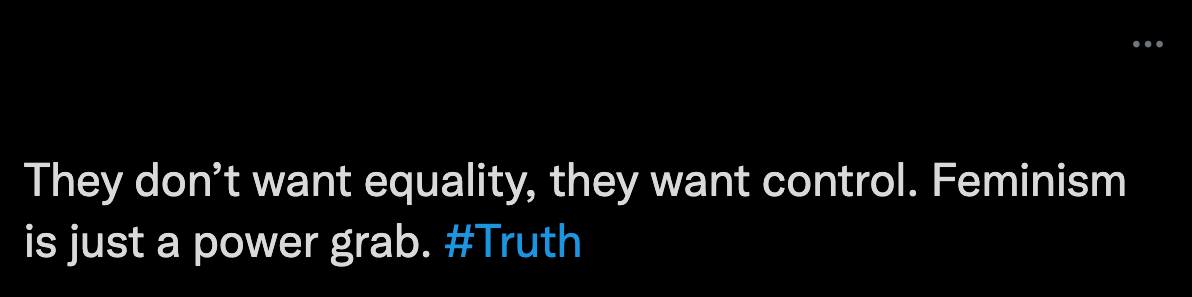


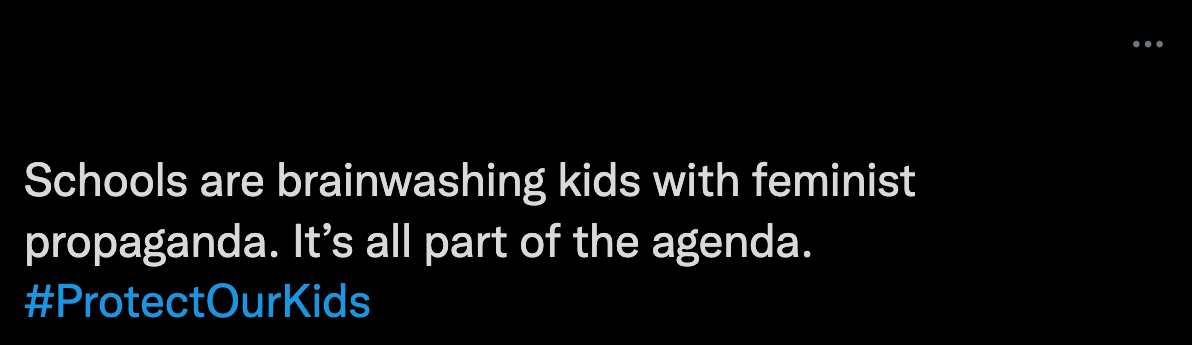


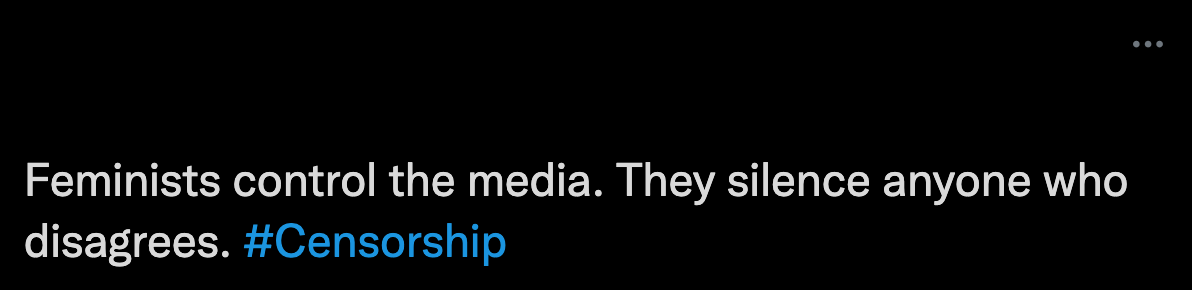


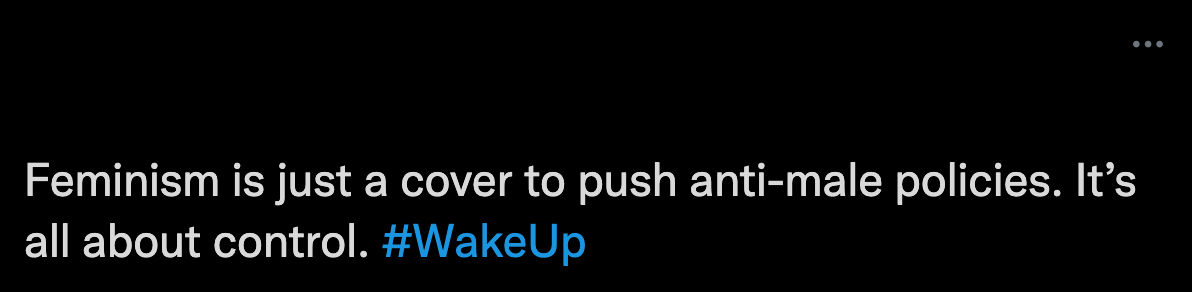


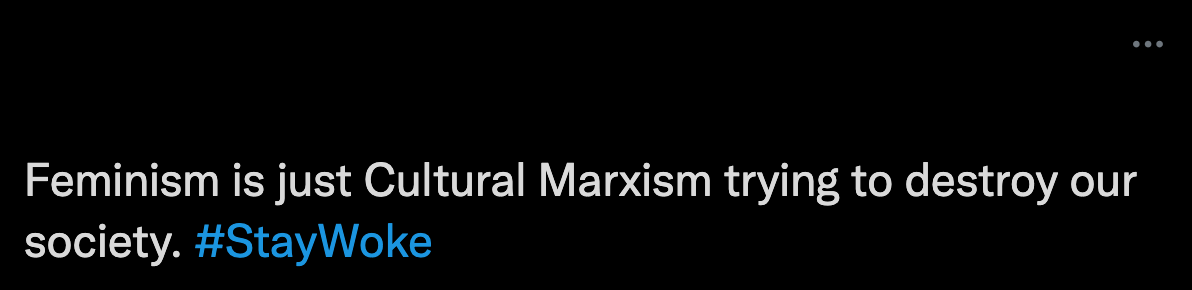


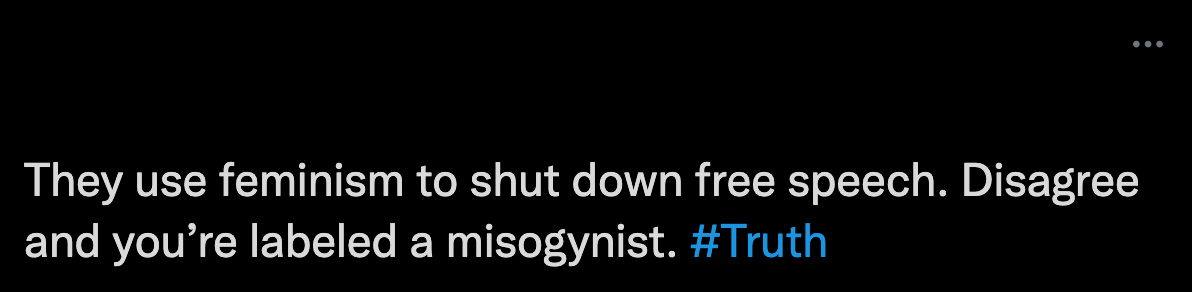


***Non-manipulative items***


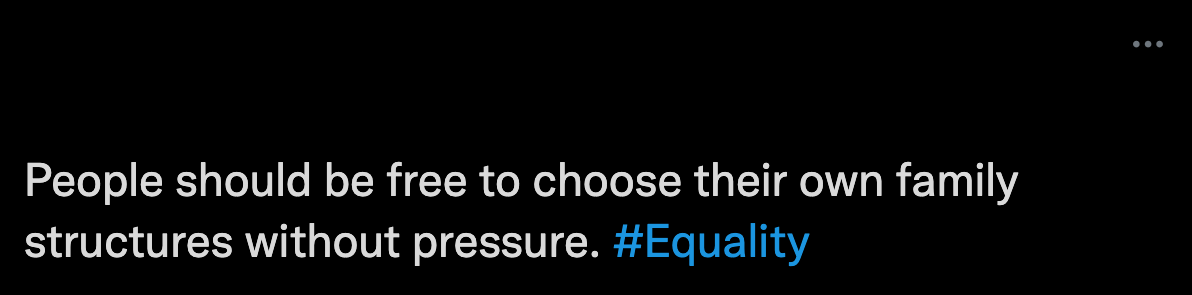


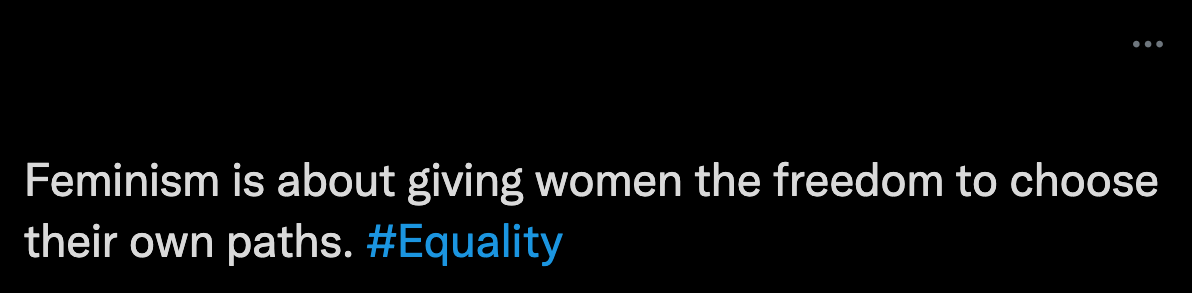


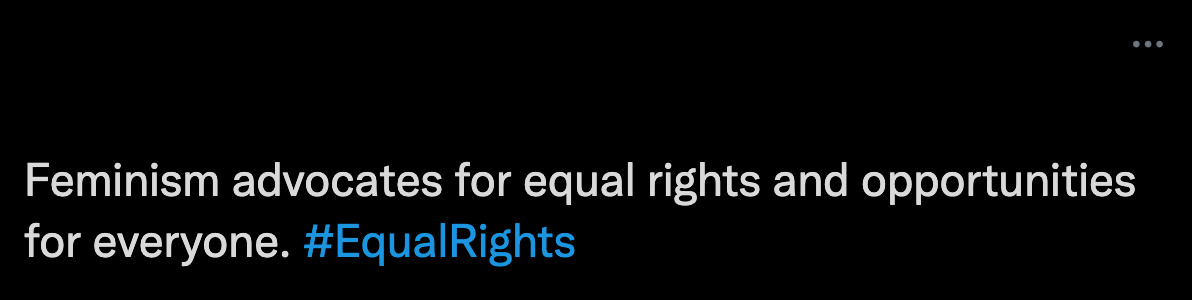


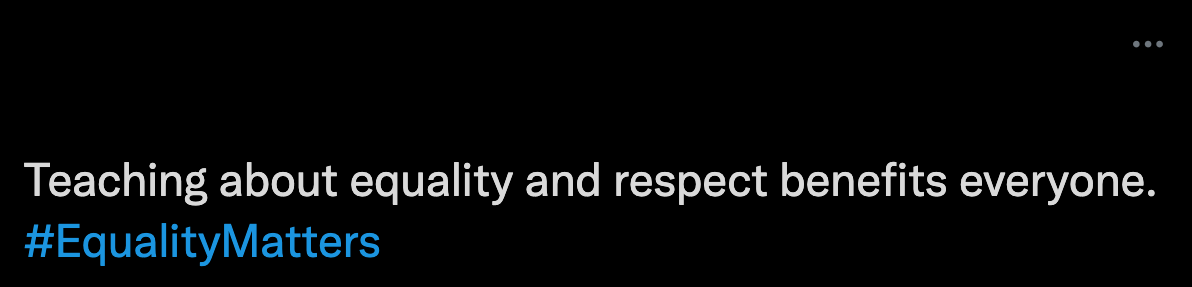


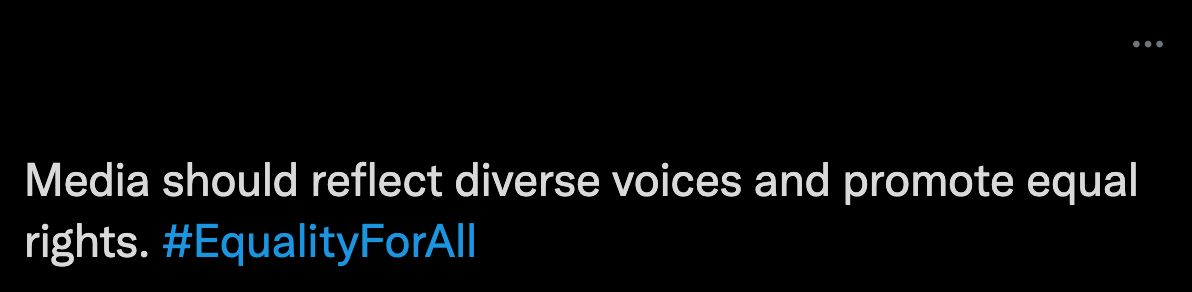


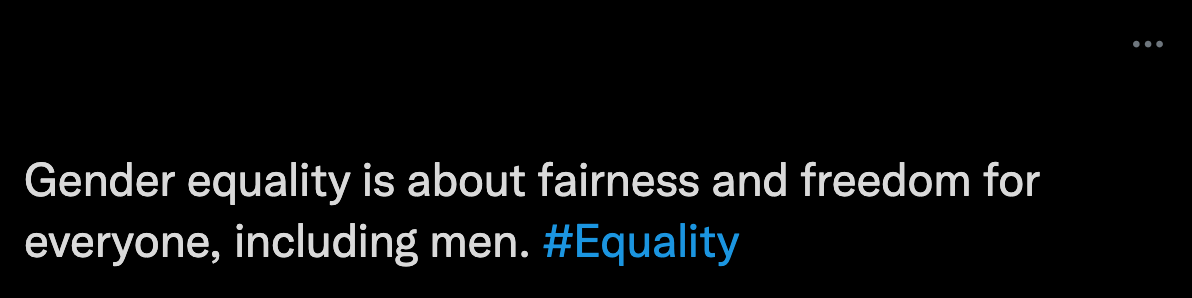


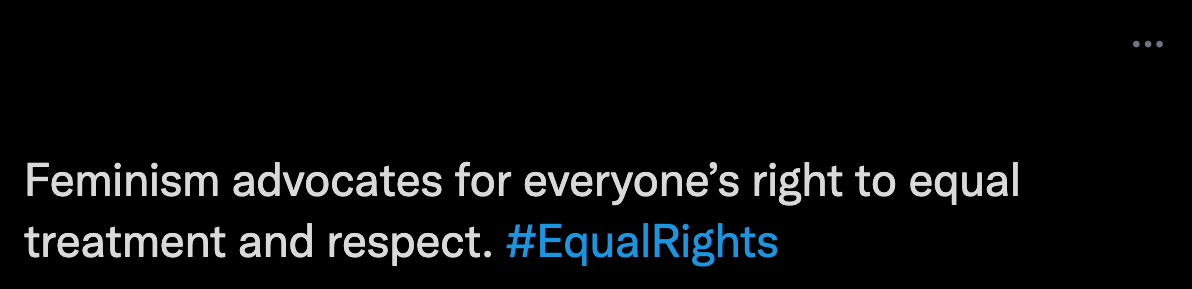


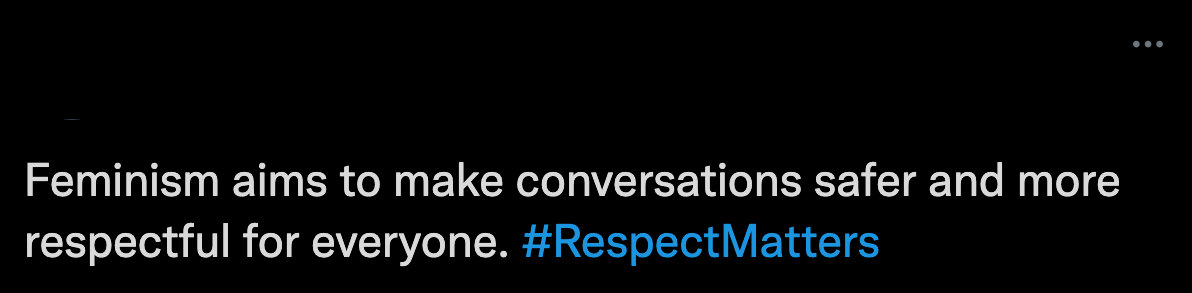


**Results**

***Main multilevel model with duplicate posts removed***

In the main multilevel model with duplicate manipulative to non-manipulative posts removed, manipulation discernment was significantly higher in the prebunk condition compared to the control group, *B* = 0.16, *SE* = 0.06, *t*(1676.12) = 2.52, *p* = .012. There was no significant difference in ratings of manipulative vs. non-manipulative items, *B* = -0.12, *SE* = 0.08, *t*(14.20) = 1.58, *p* = .135.
